# Supplementary material for: Gold nanorod synthesis catalysed by Au clusters
Source: Royal Society of Chemistry journal article supplement (doi:10.1039/c6fd00015k), 2016-01-01
Supplement: c6fd00015k1.pdf [file c6fd00015k1.pdf]

Supporting Information for

## **Gold Nanorod Synthesis Catalysed by Au Clusters**

Yasser A. Attia, Carlos Vázquez-Vázquez, M. Carmen Blanco, David Buceta and M. Arturo López-Quintela

### **Table of Contents**

Figures S1-S3

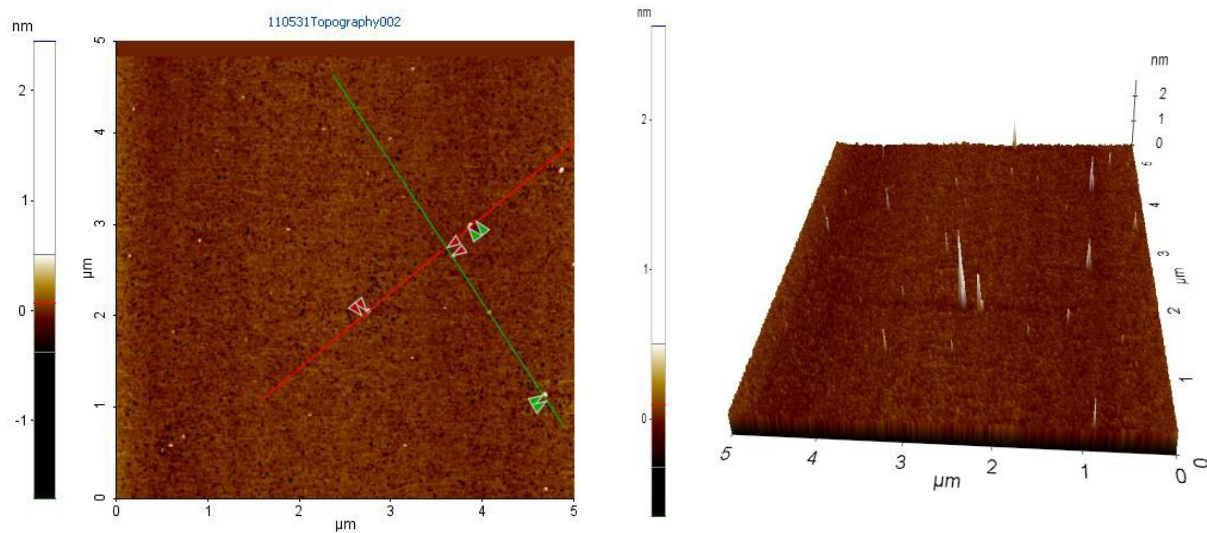

**Figure S1:** AFM images of the Au seeds solution after 10 min of preparation. Average size:  $1.5 \pm 0.2\text{nm}$ .

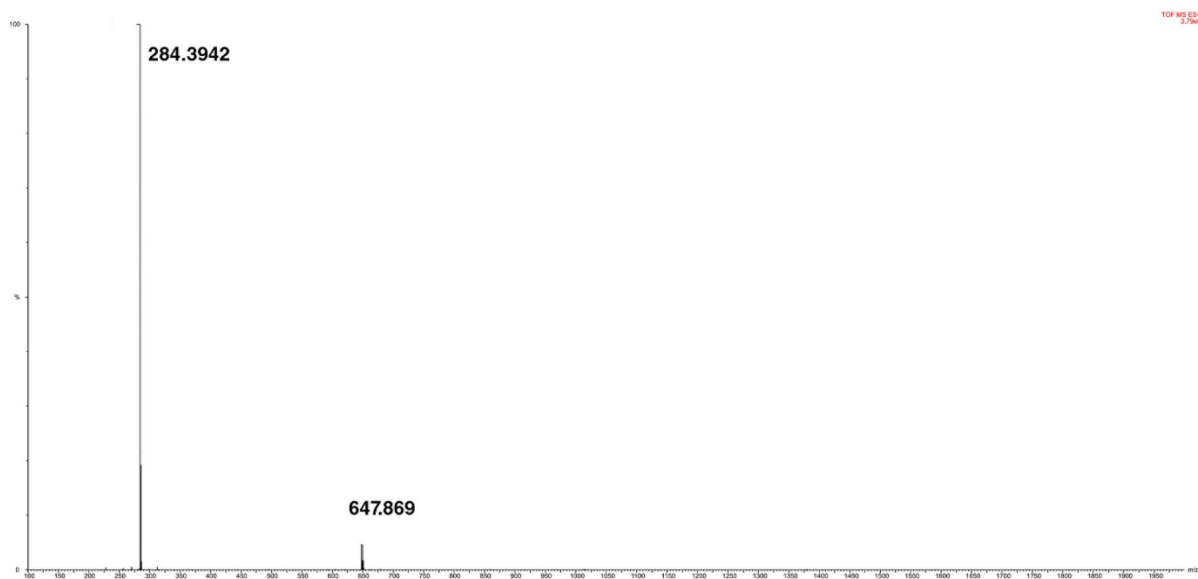

**Figure S2:** General positive ESI-mass spectrum of the seeds solution, at 5 min, after precipitation of the CTAB excess.

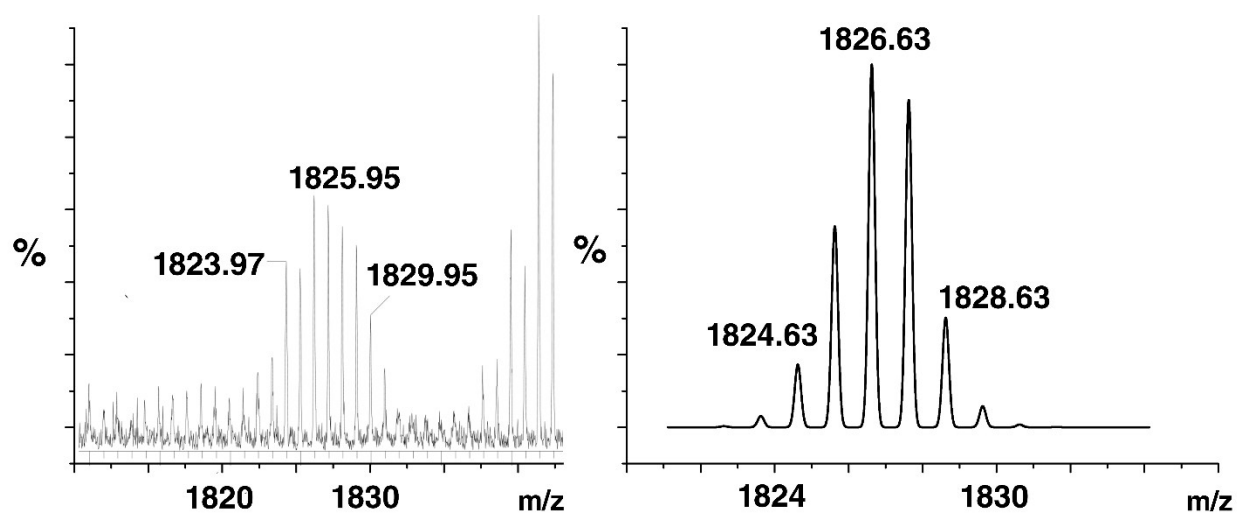

**Figure S3:** Enlarged positive ESI-mass spectrum of the observed peak, which can be associated to  $[\text{Au}_6(\text{CTA})_2\text{B}_6\text{H}_{9-11}]$ , (left) experimental and (right) theoretical.
